# Supplementary material for: Individual and food environment determinants of Mediterranean diet adherence among Lebanese adults: a cross-sectional study
Source: Research Square preprint supplement (doi:10.21203/rs.3.rs-1330949/v1), 2022-02-18
Supplement: Supplementary file 1 [file e1e9bedc1093114ef6d7f6b6.xlsx]

## Sheet: SPSS Available Data-Mediterrane
ID	Gender	Age	Weight	Height	BMI	BMI_Category	Living_area	Marit_stat	Children	Educ_lev	Health_major	Employ_Status	Meals_perday	Main_Meals	Breakfast	Restaurant	Smoking	Physic_Activ	Sleep_Quality	Health	Olive_oil1	Olive_oil2	Veggies	Fruits	Meat	Butter	Sweet_beverages	Wine	Legumes	Fish	Baked_goods	Nuts	Chicken_turkey	Sauce	Available_Fruits	Available_Veg	Available_Sweets	Available_Chips	Available_Coldcuts	Available_RegulSoftDrink	Available_DietSoftDrink	Available_Refined_pasta_etc	Available_Wholewheat_pasta_etc	Available_White_bread	Available_Wholegrain_bread	Available_Legumes	Available_Meats	Available_Fresh_frozen_fish	Available_Full_fat_milk
1	1	42	66	162	25.1486	2	2	2	2	0	0	0	0	0	0	1	0	1	1	2	0	1	0	0	1	1	0	0	1	0	1	1	1	1	1	1	1	1	1	2	2	1	1	1	1	1	1	2	2
2	1	44	70	170	24.2215	0	2	2	2	0	1	0	0	0	0	2	0	0	1	1	0	0	1	0	0	1	1	0	0	0	0	1	1	0	1	1	1	1	1	1	1	1	2	2	1	1	1	2	1
3	1	40	57	170	19.7232	0	4	2	2	0	1	0	1	1	2	2	1	1	1	2	1	1	1	1	1	1	1	0	0	0	1	0	1	1	1	1	1	1	1	1	2	1	2	1	2	1	1	1	1
4	1	31	65	160	25.3906	2	2	2	2	0	1	0	1	0	2	2	1	1	1	1	1	1	1	1	0	1	0	0	1	1	1	1	1	1	1	1	1	1	1	1	1	1	2	1	1	1	1	1	1
5	1	42	80	167	28.6851	2	2	2	2	0	0	0	0	0	0	2	0	0	1	1	0	1	1	1	0	1	1	0	1	1	1	0	1	1	1	1	2	1	1	2	2	1	1	1	1	1	1	1	2
6	1	50	63	170	21.7993	0	2	2	2	0	0	0	1	0	0	1	0	0	1	2	0	0	1	1	1	0	0	0	1	0	0	1	1	1	1	1	1	1	1	2	1	1	2	2	1	1	1	2	2
7	1	34	74	155	30.8012	3	4	2	2	0	0	0	0	0	1	2	0	1	1	2	1	1	1	1	0	1	1	0	1	0	1	1	1	1	1	1	1	1	1	2	1	1	2	1	2	1	1	1	2
8	1	41	60	160	23.4375	0	2	2	2	0	0	0	0	1	1	2	0	1	1	3	1	1	1	0	1	1	1	0	1	0	1	0	0	1	1	1	1	1	1	1	1	1	2	1	1	1	1	1	2
9	1	59	82	164	30.4878	3	2	2	2	1	999	0	0	1	0	2	0	1	2	1	1	1	1	1	1	1	0	0	1	0	1	0	0	1	1	1	1	1	2	2	1	1	2	1	1	1	1	1	1
10	0	43	93	180	28.7037	2	2	2	2	0	1	0	0	0	0	2	1	0	1	1	1	1	0	1	1	1	0	0	1	0	1	0	0	1	1	1	1	1	1	2	1	1	1	2	1	1	1	2	2
11	1	36	72	169	25.2092	2	2	2	2	0	1	3	1	1	1	2	0	1	1	1	1	1	1	1	1	1	0	0	1	0	1	0	0	1	1	1	1	2	1	2	1	1	2	1	2	1	1	1	1
12	1	45	62	158	24.8358	0	2	1	999	0	1	0	1	1	0	2	0	1	2	3	1	1	0	0	0	1	0	0	1	1	1	1	1	1	1	1	1	1	1	2	2	1	2	1	1	1	1	1	1
13	1	33	52	158	20.83	0	2	2	1	0	0	0	0	0	0	2	0	1	0	1	1	1	1	0	1	0	0	0	1	0	1	1	1	1	1	1	2	2	1	2	2	1	2	2	1	1	1	1	2
14	1	49	80	164	29.7442	2	2	2	2	0	0	0	1	0	1	2	0	0	1	2	0	1	1	0	1	1	0	0	1	0	1	1	0	0	1	1	1	1	1	2	2	1	2	1	2	1	1	2	1
15	1	36	60	162	22.8624	0	1	2	2	0	1	0	2	2	1	1	0	1	1	2	1	1	0	0	1	1	0	0	1	0	1	0	1	1	1	1	1	1	2	2	1	1	1	1	1	1	1	2	2
16	1	48	70	170	24.2215	0	1	2	2	0	1	1	2	1	2	1	1	0	1	0	1	0	1	1	1	0	1	1	1	1	1	1	1	1	1	1	1	1	1	1	1	1	1	1	1	1	1	1	2
17	1	56	65	160	25.3906	2	4	1	999	0	0	0	1	2	2	2	0	1	1	1	1	0	1	1	1	1	1	0	1	0	0	0	0	0	1	1	1	2	2	2	2	1	2	2	1	1	1	1	1
18	1	32	70	170	24.2215	0	3	2	2	0	1	0	0	0	0	2	0	1	0	1	1	1	0	0	0	1	1	0	1	0	1	0	1	1	1	1	1	1	2	2	2	1	2	2	1	2	1	2	1
19	1	54	50	154	21.0828	0	2	1	999	0	1	0	0	0	1	2	0	0	1	1	1	0	1	1	0	0	0	0	0	1	1	1	1	1	1	1	1	1	1	2	2	1	2	2	1	1	1	1	2
20	1	28	90	165	33.0579	3	2	1	999	0	1	2	0	0	2	2	0	1	1	4	0	1	0	1	0	1	1	0	0	0	1	0	1	1	1	1	2	1	2	2	1	1	2	1	1	1	1	1	1
21	1	37	115	170	39.7924	3	4	2	2	0	0	3	0	1	2	2	0	0	2	2	1	1	0	0	0	0	1	0	1	0	0	0	1	1	1	1	1	1	1	1	1	1	2	1	2	1	1	1	2
22	0	53	100	167	35.8564	3	2	2	2	1	999	0	0	0	1	2	1	1	1	3	0	1	1	1	0	0	0	0	0	0	0	0	0	0	1	1	1	1	1	1	1	1	2	1	1	1	1	2	2
23	1	47	76	155	31.6337	3	2	4	2	2	999	3	0	0	0	2	0	1	1	3	1	0	1	1	0	1	0	0	0	0	1	0	0	0	1	1	1	1	1	1	1	1	1	1	1	1	1	2	1
24	1	26	55	157	22.3133	0	2	2	2	0	0	1	0	0	0	2	0	1	3	4	1	0	0	0	0	0	1	0	0	0	1	0	0	1	1	1	1	1	2	2	2	1	2	1	2	1	1	2	2
25	1	50	53	157	21.5019	0	2	2	2	0	0	0	2	2	2	1	0	0	0	0	0	1	1	1	1	1	1	0	1	0	1	1	1	1	1	1	2	2	2	2	2	1	1	2	1	1	2	2	2
26	0	55	88	170	30.4498	3	1	2	2	0	1	2	2	1	2	2	1	1	2	3	0	0	1	0	0	0	0	0	1	1	1	0	1	1	1	1	1	1	1	1	1	1	1	1	1	1	1	1	1
27	1	44	75	160	29.2969	2	2	1	999	0	1	0	0	0	2	2	0	1	1	2	0	1	0	0	1	0	1	0	1	0	1	1	1	1	1	1	1	1	1	1	1	1	2	1	1	1	1	1	2
28	1	37	70	165	25.7117	2	1	2	2	0	1	1	1	0	0	2	0	0	0	1	1	1	1	1	1	1	0	0	1	0	1	0	1	1	1	1	1	1	2	2	2	1	1	1	1	1	1	1	2
29	1	34	56	164	20.8209	0	2	2	2	0	1	0	3	2	2	2	0	1	1	1	1	1	0	0	0	1	1	0	1	1	1	1	0	0	1	1	1	1	1	1	1	1	1	1	2	1	1	1	1
30	1	55	52	158	20.83	0	1	2	2	0	1	3	1	0	0	2	0	0	1	1	1	0	1	1	0	1	1	0	1	0	1	0	0	1	1	1	1	1	1	1	1	1	1	1	1	1	1	1	1
31	0	28	76	182	22.9441	0	2	1	999	0	1	0	0	1	0	2	1	1	1	2	1	1	0	0	1	1	1	0	1	0	0	0	0	1	1	1	1	2	1	2	1	1	2	1	1	1	1	2	1
32	1	27	70	165	25.7117	2	2	2	1	0	0	0	0	1	1	2	1	1	1	3	1	0	0	0	0	1	1	0	0	0	0	1	1	0	1	1	1	1	1	1	1	1	1	2	1	1	1	2	1
33	1	28	50	160	19.5312	0	2	1	999	0	1	3	0	0	0	2	0	0	1	2	0	0	1	1	1	1	1	0	1	0	1	1	1	1	1	1	1	2	1	1	1	1	2	1	1	1	1	2	1
34	0	38	84	180	25.9259	2	1	2	2	0	1	0	2	2	2	1	1	1	3	2	1	1	0	0	1	0	0	0	1	0	1	0	0	1	1	1	1	1	1	1	2	1	1	1	1	1	1	1	1
35	0	58	62	165	22.7732	0	2	2	2	0	1	1	1	0	0	2	0	0	0	0	0	1	1	1	0	0	0	0	1	0	1	1	1	1	1	1	1	1	1	2	1	1	2	1	1	1	2	1	2
36	1	22	62	160	24.2188	0	2	1	999	0	0	0	0	0	0	2	0	0	1	2	1	1	1	0	1	0	0	0	1	1	1	0	1	1	1	1	1	1	1	1	1	1	2	1	1	1	1	1	2
37	1	25	57	162	21.7193	0	4	1	999	0	0	0	1	0	0	2	1	1	1	1	0	1	1	0	1	0	0	1	1	1	1	0	1	1	1	1	2	2	1	2	2	1	2	1	1	1	1	1	2
38	1	27	88	164	32.7186	3	2	1	999	0	1	0	1	1	1	2	0	0	1	3	0	1	0	0	0	1	1	0	1	0	1	0	0	1	1	1	1	1	1	1	1	1	1	1	1	1	1	1	1
39	1	23	53	164	19.7055	0	2	1	999	0	0	1	1	0	0	2	0	0	1	1	1	1	1	1	1	1	1	0	1	1	1	1	1	1	1	1	1	1	1	1	1	1	1	1	1	2	1	1	2
40	0	45	81	185	23.6669	0	4	1	999	0	1	0	1	0	0	2	0	1	1	2	1	0	1	0	0	0	0	0	1	0	0	0	1	1	1	1	2	2	1	2	2	1	2	1	2	1	2	2	1
41	1	26	58.5	163	22.0181	0	2	1	999	0	1	2	0	0	0	1	0	1	1	1	0	1	1	1	1	0	1	0	1	1	1	1	0	1	1	1	1	1	1	2	1	1	2	1	1	1	1	2	2
42	1	55	58	162	22.1003	0	2	2	2	0	1	0	0	0	2	2	1	1	0	1	0	0	0	1	1	1	0	0	1	0	0	0	0	1	1	1	1	1	1	1	1	1	1	2	1	1	1	2	2
43	1	23	55	164	20.4491	0	1	1	999	0	0	3	2	1	2	2	0	0	1	2	1	0	1	1	0	0	0	0	1	1	0	1	1	1	1	1	1	1	1	1	2	1	2	1	1	1	1	1	1
44	1	55	56	154	23.6128	0	2	2	2	1	999	3	0	0	0	2	0	0	0	1	0	1	1	1	1	0	0	0	0	1	1	1	1	0	1	1	1	1	1	2	1	1	2	1	1	1	1	2	2
45	1	56	65	167	23.3067	0	2	2	2	1	999	1	1	1	0	2	0	0	1	2	1	0	1	1	0	0	0	0	0	1	1	1	1	1	1	1	1	2	2	2	2	1	1	1	1	1	2	1	2
46	1	52	95	166	34.4753	3	2	1	999	1	999	0	0	0	0	2	0	1	0	2	1	0	1	0	1	1	1	0	1	0	1	0	0	1	1	1	1	1	1	1	1	1	2	1	1	1	1	1	1
47	1	55	80	156	32.8731	3	2	2	2	1	999	2	0	1	0	2	0	1	1	3	1	1	0	1	0	0	0	0	0	0	1	1	1	1	1	1	1	1	1	1	1	1	1	1	2	1	1	1	1
48	1	50	54	150	24	0	2	2	2	2	999	0	2	2	2	2	1	1	0	0	1	1	0	0	1	0	1	0	1	1	0	1	1	1	1	1	1	1	1	1	2	1	1	1	1	1	1	1	1
49	1	55	58	160	22.6562	0	2	3	2	0	1	3	1	0	0	2	0	0	0	1	1	1	1	1	0	0	0	0	1	1	1	1	0	1	1	1	1	2	2	2	1	2	1	2	1	1	2	1	2
50	1	28	52	160	20.3125	0	2	1	999	0	1	0	2	2	2	2	0	1	2	2	0	0	0	0	1	1	1	0	1	0	1	1	1	1	1	1	1	1	1	2	2	1	2	1	1	1	1	1	2
51	1	26	61	166	22.1367	0	2	1	999	0	1	0	1	2	2	2	1	1	3	2	1	0	0	0	1	0	0	0	1	0	0	1	1	1	1	1	1	1	1	1	2	1	2	2	1	1	1	2	1
52	1	34	70	170	24.2215	0	2	1	999	0	1	0	2	2	2	2	1	1	1	2	0	1	0	0	1	1	1	0	1	0	1	1	1	1	1	1	1	1	1	2	1	1	2	1	2	1	1	2	1
53	0	35	95	185	27.7575	2	2	2	2	1	999	0	2	2	2	2	0	0	1	2	1	0	1	1	1	0	1	1	0	0	1	1	0	1	1	1	2	2	2	1	1	1	1	1	2	1	2	2	2
54	1	28	75	165	27.5482	2	2	2	2	0	1	0	0	1	1	2	1	1	2	0	0	0	0	1	0	0	0	0	1	1	1	1	1	1	1	1	1	1	1	1	1	1	2	1	2	1	1	1	1
55	0	21	74	175	24.1633	0	1	1	999	0	1	2	1	0	0	2	0	1	0	2	1	1	1	1	1	1	1	1	1	1	1	1	1	1	1	1	1	1	1	1	1	1	1	1	1	1	1	1	1
56	1	27	59	170	20.4152	0	2	1	999	0	1	0	1	1	0	0	0	1	1	1	0	0	0	1	1	1	1	1	1	1	1	1	1	1	1	1	1	1	1	2	2	1	1	1	2	1	1	2	2
57	1	32	54	162	20.5761	0	2	1	999	0	1	0	1	1	1	2	1	1	2	3	1	1	1	0	1	0	0	0	0	0	1	1	0	1	1	1	1	1	2	2	2	1	1	1	1	1	1	2	1
58	1	33	56	156	23.0112	0	3	1	999	0	1	0	1	1	1	2	1	1	0	0	0	0	0	0	0	0	0	0	1	0	1	0	0	0	1	1	1	1	2	2	2	1	2	1	2	1	1	2	1
59	1	30	59	166	21.4109	0	2	2	2	0	1	0	1	0	0	1	0	1	1	3	0	1	1	0	0	0	0	0	1	0	1	0	1	1	1	1	1	2	2	1	1	1	2	2	1	2	2	2	2
60	1	22	48	152	20.7756	0	2	1	999	1	999	3	1	1	1	2	0	1	0	3	1	1	0	0	1	1	1	0	0	0	0	0	1	1	1	1	1	1	2	2	2	1	2	1	1	1	1	1	1
61	1	23	98	160	38.2812	3	1	1	999	0	1	2	0	0	0	2	0	0	0	1	1	0	1	0	1	1	1	0	1	0	1	0	1	1	1	1	1	1	1	1	1	1	2	1	1	1	2	1	1
62	1	50	51	160	19.9219	0	4	2	2	2	999	0	1	0	0	0	0	1	1	2	1	1	1	1	0	0	1	0	1	0	1	1	0	1	1	1	1	1	2	1	2	2	1	1	1	1	1	2	1
63	1	23	55	162	20.9572	0	2	1	999	0	0	1	0	0	0	2	0	0	0	0	1	1	1	1	1	0	0	0	1	0	1	0	0	1	1	1	1	1	1	1	1	1	2	1	2	1	1	1	1
64	1	21	47	155	19.563	0	2	1	999	0	0	3	2	0	0	2	0	1	1	2	1	0	0	1	1	1	1	0	1	1	0	0	1	0	1	1	1	1	1	2	2	1	1	1	1	1	1	2	1
65	1	26	54	155	22.4766	0	2	1	999	0	1	0	1	1	1	2	1	0	1	0	1	0	0	1	1	0	0	0	0	0	1	0	1	1	1	1	1	1	1	1	2	1	2	1	1	1	1	2	1
66	1	23	57	162	21.7193	0	2	1	999	0	1	2	1	1	1	0	0	1	1	1	1	0	1	0	1	0	0	0	1	1	1	0	1	1	1	1	1	1	1	1	1	1	1	1	1	1	1	1	1
67	1	28	88	162	33.5315	3	1	2	2	0	1	0	1	0	0	2	1	0	1	1	0	0	0	1	0	1	1	0	1	0	1	0	1	1	1	1	1	2	2	1	1	1	2	1	1	1	1	2	1
68	1	27	52	160	20.3125	0	2	2	1	0	1	0	0	0	0	2	1	1	1	1	1	0	0	0	1	1	1	0	0	0	0	0	0	1	1	1	1	1	1	1	1	1	2	1	2	1	1	1	1
69	1	23	72	165	26.4463	2	1	1	999	0	1	2	0	1	2	2	0	1	1	3	0	1	0	0	0	0	1	0	1	0	0	0	1	1	1	1	1	1	2	1	2	1	2	1	2	2	1	2	2
70	0	20	70	175	22.8571	0	1	1	999	1	999	3	1	1	1	2	0	0	1	1	1	1	0	0	0	1	1	0	0	0	1	0	0	0	1	1	1	1	1	1	1	1	2	1	2	1	1	1	2
71	1	26	68	170	23.5294	0	1	1	999	0	1	3	1	1	2	2	0	1	1	2	0	1	1	0	0	0	1	0	1	0	1	0	1	1	1	1	1	1	1	1	1	1	2	1	1	1	1	1	2
72	1	22	58	161	22.3757	0	2	1	999	0	1	1	0	0	0	2	0	0	2	1	1	0	1	1	0	1	1	0	1	0	1	0	1	0	1	1	1	1	1	2	2	1	2	1	2	1	1	1	2
73	1	30	68	179	21.2228	0	2	3	1	0	0	1	0	0	1	2	0	0	0	1	1	1	1	0	0	0	0	0	1	0	1	1	1	1	1	1	1	1	1	2	2	1	2	1	1	1	1	2	2
74	0	37	86	182	25.963	2	2	2	2	2	999	0	2	2	0	2	1	1	1	0	1	1	1	0	1	1	0	1	1	0	1	1	0	1	1	1	1	1	1	1	2	1	2	1	1	1	1	1	1
75	1	31	65	170	22.4913	0	2	1	999	0	0	1	0	0	0	2	0	0	1	0	1	0	0	1	0	1	0	0	1	0	1	0	1	1	1	1	1	1	1	2	1	1	1	2	1	1	1	1	2
76	1	24	70	157	28.3987	2	2	1	999	0	0	2	2	2	2	2	0	0	0	2	1	1	1	0	0	0	0	0	1	0	1	1	1	1	1	1	1	1	1	2	2	1	2	1	1	1	1	2	1
77	1	45	65	170	22.4913	0	5	2	2	0	1	0	1	1	0	2	0	1	0	1	0	1	1	1	1	0	0	0	1	1	1	1	0	1	1	1	1	1	2	1	2	1	2	2	1	1	1	1	2
78	1	46	53	167	19.0039	0	2	2	2	0	0	1	0	0	1	2	0	0	0	1	1	0	1	0	1	1	1	0	1	0	1	1	1	1	1	1	1	1	2	2	1	1	1	2	1	1	1	1	2
79	1	37	67	156	27.5312	2	2	2	2	0	1	0	0	0	2	2	0	1	1	2	0	0	0	0	1	1	1	0	1	0	0	0	1	1	1	1	1	1	2	1	1	1	2	1	1	1	1	2	1
80	1	31	60	162	22.8624	0	2	1	999	0	0	1	0	0	0	2	0	0	1	0	1	1	1	1	1	1	1	0	1	0	0	1	1	0	1	1	2	2	2	2	2	1	2	1	1	1	1	1	2
81	1	22	60	170	20.7612	0	2	1	999	0	0	0	2	2	0	2	0	1	2	2	0	0	0	0	0	0	0	0	1	0	1	1	1	1	1	1	1	1	2	1	2	1	2	1	2	1	1	2	1
82	1	41	51	165	18.7328	0	2	2	2	0	1	0	1	0	0	2	0	0	0	1	0	1	0	1	0	0	0	0	1	0	1	0	1	1	1	1	1	1	2	1	2	1	2	1	2	1	1	2	1
83	1	28	50	165	18.3655	1	4	1	999	0	1	0	1	1	1	2	0	1	0	1	0	0	0	1	0	0	1	0	0	0	1	0	1	1	1	1	1	1	1	1	2	1	2	1	1	1	1	1	1
84	1	22	55	160	21.4844	0	2	1	999	0	0	0	0	0	0	2	0	1	1	0	0	0	1	1	0	1	1	0	1	1	1	1	0	1	1	1	1	1	1	1	2	1	1	1	1	1	1	1	1
85	1	29	62	157	25.1532	2	2	2	1	0	1	0	1	1	1	0	1	1	1	2	0	0	0	0	0	0	1	0	1	0	0	1	0	0	2	1	1	1	1	1	2	1	2	1	1	1	1	2	1
86	1	24	57	154	24.0344	0	2	2	2	0	1	0	1	2	2	2	0	1	0	2	0	1	1	1	0	1	1	0	1	0	1	0	0	1	1	1	2	1	1	2	2	1	1	1	2	1	1	1	2
87	1	21	65	170	22.4913	0	2	1	999	0	0	2	1	2	1	2	0	1	1	2	0	0	1	0	1	1	0	0	1	0	1	1	1	1	1	1	1	1	1	1	2	1	1	1	1	1	1	2	1
88	1	58	50	162	19.052	0	2	2	2	0	0	3	1	1	1	1	0	0	1	1	1	1	1	1	1	1	1	1	1	1	0	1	1	1	1	1	2	2	1	2	1	2	1	2	1	1	1	1	2
89	1	25	57	158	22.8329	0	2	1	999	0	0	0	1	1	2	2	0	1	1	2	1	1	0	0	0	0	1	0	0	0	0	0	1	1	1	1	1	1	1	1	1	1	2	1	2	1	1	2	1
90	0	42	73	177	23.3011	0	1	2	2	0	1	0	2	0	1	2	0	0	0	0	1	0	1	1	1	1	0	0	0	0	0	0	0	1	1	1	1	2	2	2	2	1	1	2	1	1	2	2	1
91	1	43	60	154	25.2994	2	2	2	2	0	1	3	0	0	0	2	0	1	3	4	0	1	0	0	1	0	0	0	0	0	0	0	1	1	1	1	1	1	1	1	1	1	2	1	2	1	1	2	2
92	0	26	88	175	28.7347	2	2	1	999	0	1	0	1	1	2	1	1	1	3	2	0	0	0	0	1	0	1	0	0	1	0	0	0	1	1	1	1	1	1	2	2	1	1	1	2	1	1	1	1
93	1	26	42	160	16.4062	1	2	1	999	0	0	2	0	1	1	1	1	1	1	2	0	1	1	1	0	0	0	0	1	0	0	0	1	1	1	1	1	1	1	1	1	1	2	1	2	1	1	1	1
94	0	31	75	185	21.9138	0	2	1	999	0	0	0	0	0	0	2	1	1	1	1	1	0	1	1	0	0	0	0	1	1	0	1	1	1	1	1	2	1	1	2	2	1	2	1	1	1	1	1	2
95	1	47	75	167	26.8923	2	2	2	2	0	1	0	0	0	0	2	0	1	1	1	1	1	1	0	1	1	1	0	1	0	1	1	1	1	1	1	1	1	2	2	1	1	2	1	2	1	1	2	1
96	1	36	59	170	20.4152	0	2	2	2	0	1	1	0	1	1	1	1	1	1	2	1	1	0	0	0	0	1	0	0	1	1	0	1	1	1	1	1	1	1	1	1	1	1	1	1	1	1	1	1
97	0	45	80	180	24.6914	0	2	2	2	0	0	0	2	2	2	2	0	0	1	1	1	1	1	1	1	1	1	0	1	0	0	0	1	1	1	1	2	2	2	2	1	1	1	1	1	1	1	1	1
98	1	47	125	163	47.0473	3	2	3	2	1	999	0	0	0	0	2	1	1	1	3	0	1	0	1	1	1	0	0	1	0	1	0	0	1	2	2	1	1	1	2	1	1	2	2	1	1	1	2	2
99	0	66	72	180	22.2222	0	2	2	1	1	999	0	2	0	2	2	1	1	1	1	0	1	1	1	0	0	0	0	1	0	1	0	1	1	1	1	1	2	1	2	2	1	1	2	1	1	1	1	2
100	1	63	70	155	29.1363	2	2	2	2	1	999	3	1	0	0	0	0	1	0	2	1	0	1	1	1	0	0	0	1	1	1	1	1	1	1	1	1	2	1	2	2	1	2	2	1	2	1	1	2
101	1	23	45	152	19.4771	0	2	1	999	0	0	3	0	1	1	2	0	1	0	1	1	0	1	1	0	1	1	0	1	0	1	0	1	1	1	1	1	1	1	1	1	1	2	1	1	1	1	2	1
102	1	49	73	165	26.8136	2	2	2	2	1	999	0	0	0	1	1	1	1	1	2	0	1	0	0	1	1	1	0	1	0	1	1	0	0	1	1	1	1	1	1	1	1	2	1	2	1	1	1	1
103	0	20	67	170	23.1834	0	5	1	999	0	1	2	0	1	2	2	1	0	1	2	1	1	0	0	0	0	1	1	0	1	1	1	1	1	1	1	1	2	1	1	2	1	1	1	1	1	1	2	1
104	1	59	73	170	25.2595	2	2	2	2	0	1	0	0	0	0	2	1	1	1	0	1	1	1	1	0	0	1	0	1	0	0	0	0	1	1	1	1	2	1	1	2	1	1	1	1	1	1	2	2
105	1	53	60	163	22.5827	0	2	2	2	1	999	0	1	0	0	2	1	1	1	2	1	0	0	0	1	1	1	1	1	0	0	0	0	1	1	1	1	2	1	1	1	1	2	1	2	1	1	1	1
106	1	21	55	172	18.5911	0	2	1	999	1	999	3	1	0	0	2	0	1	1	2	0	0	1	0	1	0	0	0	1	0	1	1	0	1	1	1	1	2	1	2	2	1	1	1	1	1	1	1	1
107	0	27	79	178	24.9337	0	2	1	999	1	999	0	0	0	0	2	1	0	1	0	1	0	1	1	0	0	1	0	0	1	1	1	0	1	1	1	1	1	1	1	1	1	2	1	1	1	1	1	1
108	1	22	55	163	20.7008	0	2	1	999	0	0	1	0	0	0	2	0	0	0	0	1	1	1	1	1	1	0	0	0	1	1	1	1	1	1	1	1	2	1	1	1	1	2	1	2	1	1	1	1
109	1	26	65	173	21.7181	0	4	1	999	0	1	0	0	0	0	2	1	0	0	2	0	1	0	0	0	1	1	0	0	1	1	1	1	1	1	1	1	1	1	2	1	1	2	1	1	1	1	1	2
110	1	24	54	164	20.0773	0	2	1	999	0	0	0	0	0	0	2	1	0	1	2	1	1	1	0	1	1	0	0	1	0	0	0	1	1	1	1	1	1	1	2	1	1	2	1	1	1	1	2	1
111	1	56	68	170	23.5294	0	2	2	2	1	999	1	0	0	0	0	0	1	0	0	1	1	1	0	0	0	0	0	1	0	1	1	0	1	1	1	1	2	1	1	2	1	1	1	2	1	1	2	1
112	1	41	55	169	19.257	0	2	2	2	0	0	0	1	0	0	2	1	0	0	0	0	1	1	1	1	1	0	0	1	0	0	1	0	1	1	1	1	2	2	1	2	1	2	1	1	1	1	1	1
113	0	23	58	176	18.7242	0	1	1	999	0	1	3	1	0	0	0	1	0	1	1	1	0	1	0	0	1	0	0	1	0	0	0	1	1	1	1	1	1	1	2	1	1	2	1	1	1	1	1	2
114	1	42	70	172	23.6614	0	2	2	2	1	999	2	2	2	2	2	1	0	2	0	1	1	1	1	1	0	1	0	1	1	0	0	1	1	2	1	2	2	2	2	1	1	2	1	2	1	2	1	2
115	1	47	59	163	22.2063	0	2	2	2	0	1	1	0	1	2	2	0	0	2	2	0	1	1	1	0	0	0	0	1	1	1	1	0	0	1	1	1	1	1	1	1	1	1	1	1	1	1	1	1
116	1	30	58	162	22.1003	0	2	1	999	0	1	0	0	0	0	2	1	1	1	1	0	1	1	0	0	1	0	1	0	0	1	0	0	1	1	1	1	1	1	2	2	1	2	2	1	1	1	1	1
117	1	50	57.9	169	20.2724	0	2	2	2	0	1	3	1	0	0	2	1	0	2	1	0	1	1	1	1	0	1	0	0	0	0	1	1	0	1	1	1	1	1	2	1	1	2	2	1	1	2	1	2
118	0	23	80	180	24.6914	0	2	1	999	0	1	3	0	0	1	1	0	0	2	2	1	0	0	0	0	0	1	0	1	0	1	1	1	0	1	1	1	1	1	2	2	1	2	1	1	1	2	2	2
119	1	42	58	164	21.5645	0	2	2	2	0	0	3	0	0	0	1	0	1	1	1	1	1	1	1	1	1	0	0	0	0	1	1	0	1	1	1	2	1	1	2	1	1	2	1	2	1	1	1	2
120	1	37	80	172	27.0416	2	2	2	2	2	999	2	1	1	1	2	1	0	1	3	1	0	1	1	1	0	0	0	1	1	1	1	0	1	2	2	2	2	2	2	2	2	2	1	2	1	2	2	2
121	1	59	57	155	23.7253	0	2	2	2	0	1	0	2	2	0	2	1	1	1	2	0	0	1	0	1	1	0	0	0	0	1	0	1	0	1	1	1	1	2	2	2	1	2	1	1	1	1	2	1
122	0	53	80	170	27.6817	2	2	2	2	0	0	1	2	2	2	2	0	1	1	2	1	1	0	1	1	1	1	0	1	0	1	0	1	1	1	1	1	1	1	2	1	1	2	1	1	1	1	1	2
123	1	35	62	162	23.6244	0	2	2	2	0	0	0	0	0	0	2	0	0	1	1	0	1	1	0	0	0	0	0	1	0	1	1	0	0	1	1	1	2	2	1	1	1	2	1	1	1	1	1	1
124	1	21	51	155	21.2279	0	4	1	999	0	0	3	0	1	1	2	0	1	1	0	1	1	1	0	1	1	1	0	1	0	1	0	1	1	1	1	2	2	2	1	2	1	2	1	1	1	1	1	1
125	1	22	60	163	22.5827	0	2	2	2	0	1	1	0	0	0	2	0	1	1	0	1	1	0	0	1	1	0	0	1	0	1	0	0	1	1	1	1	1	1	1	1	1	2	1	2	1	1	2	1
126	1	24	55	175	17.9592	1	2	1	999	0	0	3	0	0	0	2	0	0	3	2	1	1	1	1	0	0	1	0	1	0	0	1	0	1	1	1	1	1	1	1	1	1	1	1	1	1	1	1	1
127	1	26	59	172.5	19.8278	0	2	1	999	0	1	2	1	2	1	2	1	1	3	2	0	0	0	0	0	1	1	0	1	0	1	0	1	1	1	1	1	1	1	2	2	1	2	2	1	1	1	1	1
128	1	26	57	164	21.1927	0	5	1	999	0	0	0	0	0	0	2	0	0	2	1	1	0	1	1	0	1	1	0	1	0	1	1	1	1	1	1	1	1	1	2	2	1	1	1	1	1	1	1	1
129	1	22	57	161	21.9899	0	3	1	999	0	0	2	1	0	0	2	0	0	0	0	0	1	1	0	0	1	1	0	1	0	1	1	0	1	1	1	1	1	1	1	2	1	1	1	1	1	1	1	1
129	1	27	72	162	27.4348	2	1	1	999	0	1	0	0	1	2	1	1	1	0	1	0	0	0	1	1	1	0	0	1	1	0	0	1	1	1	1	1	1	1	1	2	1	2	1	1	1	1	2	1
130	1	25	67	164	24.9108	0	2	1	999	0	0	0	0	0	0	2	1	1	1	2	1	1	1	1	0	0	0	0	1	0	1	0	0	0	1	1	1	2	1	1	2	1	2	1	1	1	1	2	1
131	0	21	85	181	25.9455	2	2	1	999	1	999	0	0	1	1	2	1	1	1	1	0	0	0	0	0	1	1	0	1	0	0	1	0	0	1	1	1	1	1	1	2	1	2	1	1	1	1	2	1
132	1	22	58	166	21.048	0	5	1	999	0	0	3	0	1	2	2	0	1	1	3	0	0	1	1	1	1	1	0	1	0	1	1	1	1	1	1	1	2	2	2	1	1	2	1	1	1	1	1	1
133	1	44	63	164	23.4236	0	2	2	2	0	1	0	2	2	2	2	0	1	1	2	0	0	1	0	1	1	0	0	1	0	1	1	1	1	1	1	1	1	1	1	1	1	1	1	1	1	1	2	1
134	1	31	50	160	19.5312	0	2	2	1	0	0	1	0	0	0	2	1	1	1	2	0	0	0	0	0	1	1	0	0	0	0	0	0	1	1	1	2	1	1	1	1	1	2	1	1	1	1	1	2
135	1	31	54	160	21.0938	0	2	2	1	0	1	0	0	0	1	2	0	1	1	2	1	0	1	0	1	1	1	0	1	0	0	1	1	1	1	1	1	1	1	1	1	1	1	1	1	1	1	1	1
136	0	57	90	170	31.1419	3	2	2	2	0	1	0	1	0	2	2	1	0	0	0	1	1	1	1	1	0	0	0	1	0	0	0	1	1	1	1	1	1	1	1	2	1	2	1	1	1	1	2	1
137	0	51	85	169	29.7609	2	2	2	2	2	999	0	1	1	1	2	0	0	1	0	1	1	0	1	1	0	0	0	1	1	1	1	1	1	1	1	1	2	1	1	1	1	1	1	1	1	1	2	1
138	0	35	85	175	27.7551	2	2	2	2	0	1	2	1	0	0	2	1	0	0	0	0	0	1	1	1	1	1	0	1	0	0	0	1	1	1	1	1	2	1	2	2	1	2	1	1	1	1	2	1
140	1	51	87	170	30.1038	3	2	2	2	1	999	3	1	1	2	2	1	1	1	2	1	0	0	1	0	0	0	0	1	0	0	1	0	1	1	1	1	1	1	1	2	1	1	1	2	1	1	2	1
141	0	52	85	168	30.1162	3	2	2	2	2	999	0	1	1	2	2	0	1	1	0	1	0	0	0	0	0	1	1	1	0	0	0	0	1	1	1	1	1	1	1	2	1	1	1	1	1	1	1	1
142	1	48	77	160	30.0781	3	2	1	999	0	1	0	0	0	0	2	0	0	0	2	1	1	1	0	0	0	0	0	0	0	1	0	0	1	1	1	1	1	1	2	1	1	2	1	2	1	1	2	2
143	1	45	121	186	34.9751	3	2	3	2	0	1	0	0	1	0	1	1	1	2	3	1	0	1	1	0	0	0	0	1	0	1	1	1	1	1	1	2	1	1	2	1	1	2	2	1	2	1	2	1
144	1	43	69	172	23.3234	0	2	2	2	0	1	2	1	0	0	1	0	1	1	1	0	0	1	1	0	1	1	0	0	0	1	1	1	0	1	1	1	1	1	2	1	1	1	2	1	2	1	2	1
145	1	24	75	156	30.8185	3	2	1	999	0	0	0	0	0	0	2	0	0	1	1	0	1	1	0	1	1	1	0	1	0	1	0	1	1	1	1	1	1	1	1	2	1	2	2	1	1	1	2	2
146	1	20	50	163	18.8189	0	2	1	999	1	999	3	1	0	0	2	0	1	0	1	1	0	0	0	1	0	1	0	1	0	0	0	0	1	1	1	1	2	1	1	1	1	2	1	2	1	1	2	1
147	1	29	53	159	20.9644	0	2	2	1	0	1	0	1	0	0	2	1	1	1	2	0	1	1	0	1	1	1	0	0	0	1	1	1	1	1	1	1	1	1	1	1	1	2	1	2	1	1	2	1
148	1	21	45	165	16.5289	1	2	1	999	2	999	3	0	0	0	1	0	1	0	0	0	0	0	0	0	0	1	0	1	1	0	1	0	1	1	1	1	1	1	1	1	1	2	1	2	1	1	1	1
149	0	43	65	165	23.8751	0	1	2	2	1	999	0	1	0	0	2	0	1	1	2	0	0	0	1	0	0	0	0	1	0	0	1	0	1	1	1	1	1	1	1	2	1	2	1	2	1	1	1	1
150	1	46	70	159	27.6888	2	2	2	2	2	999	1	1	1	1	2	1	1	2	2	0	0	0	0	1	1	1	0	1	0	0	1	1	1	1	1	1	1	1	1	1	1	1	1	2	1	1	2	2
151	1	40	60	160	23.4375	0	2	2	2	1	999	3	0	1	2	2	1	1	2	3	0	1	0	0	1	1	0	0	1	0	1	0	0	1	1	1	1	1	1	1	1	1	2	1	2	1	1	1	1
152	0	56	88	175	28.7347	2	2	2	2	0	1	0	1	0	0	2	0	0	1	1	1	0	1	1	1	1	0	0	1	1	1	1	1	1	1	1	1	1	1	2	2	1	1	2	1	1	1	1	1
153	0	52	75	178	23.6713	0	2	2	2	0	1	2	1	1	2	1	0	1	2	1	0	0	1	1	1	1	0	0	1	0	1	0	0	1	1	1	1	1	1	1	1	1	2	1	2	1	1	1	1
154	1	37	70	170	24.2215	0	2	2	2	0	1	3	0	1	2	2	1	1	0	2	1	1	1	0	0	1	1	1	1	1	1	1	0	1	1	1	1	1	1	1	1	1	1	1	2	1	1	1	1
155	1	55	65	165	23.8751	0	2	2	2	1	999	3	0	0	0	1	0	0	1	2	1	0	1	1	0	0	0	0	1	1	1	0	1	0	1	1	1	1	1	1	1	1	1	1	1	1	1	1	2
156	1	43	73	163	27.4756	2	2	2	2	0	1	0	1	2	2	2	1	1	3	3	1	1	1	1	1	1	0	0	1	0	1	0	0	1	1	1	1	1	1	1	1	1	2	1	2	1	1	1	1
157	1	50	70	160	27.3438	2	2	2	2	0	1	1	0	1	1	2	0	1	1	3	0	0	1	1	1	0	0	0	1	0	1	0	1	1	1	1	1	1	1	2	1	1	1	1	1	1	1	2	2
158	1	40	70	167	25.0995	2	2	2	2	1	999	3	1	2	2	2	0	0	1	1	1	0	1	1	1	1	1	0	1	1	1	0	1	1	1	1	2	1	1	2	2	1	1	1	1	1	1	1	1
159	0	58	105	190	29.0859	2	2	2	2	0	1	0	2	2	2	2	1	1	2	2	1	0	1	0	1	1	1	0	1	0	1	1	1	1	1	1	1	2	1	2	2	1	2	1	1	1	1	2	1
160	1	26	50	157	20.2848	0	2	1	999	0	0	0	1	1	1	0	1	0	1	1	1	0	1	1	0	1	0	0	1	0	0	1	1	1	1	1	1	1	1	2	2	1	2	1	2	1	1	2	1
161	0	29	77	180	23.7654	0	2	1	999	0	1	0	2	0	1	2	0	0	1	1	1	1	0	1	1	1	0	0	1	0	1	0	1	1	1	1	1	1	2	2	1	2	1	1	1	1	1	2	1
162	1	25	49	167	17.5697	1	2	1	999	0	0	0	0	1	2	2	0	0	0	0	0	0	1	1	1	0	1	0	1	0	0	0	1	0	1	1	2	2	1	2	1	1	2	2	2	1	1	1	2
163	0	21	75	180	23.1481	0	2	1	999	0	0	3	2	2	2	2	0	1	2	1	0	0	0	0	0	0	0	0	0	0	0	0	0	0	1	1	1	2	1	1	2	1	2	1	2	1	1	2	1
164	1	34	52	160	20.3125	0	2	2	1	0	1	0	1	0	0	2	1	1	1	1	1	0	1	0	0	0	0	0	1	0	1	0	0	0	1	1	2	2	1	2	1	1	1	2	1	1	2	1	1
165	1	32	63	162	24.0055	0	2	1	999	0	1	0	0	0	0	2	0	1	2	2	1	1	0	0	1	1	0	0	0	0	1	1	0	0	1	1	1	1	1	2	2	1	1	2	1	1	1	2	1
166	0	28	60	170	20.7612	0	2	1	999	0	1	0	1	1	0	2	0	0	1	1	1	1	1	1	0	0	0	0	1	0	1	1	1	1	1	1	1	1	1	2	2	1	1	2	1	1	1	1	1
167	1	40	80	160	31.25	3	2	2	2	0	1	0	0	0	0	2	1	1	2	3	1	1	1	1	0	1	1	0	0	0	1	0	1	1	1	1	1	1	1	1	1	1	1	1	1	1	1	1	1
168	0	26	100	186	28.9051	2	1	2	1	0	0	0	1	2	1	2	0	1	1	1	0	0	0	0	0	1	1	0	0	0	0	0	1	1	2	2	1	1	2	2	1	1	2	2	2	1	1	2	2
169	1	22	90	170	31.1419	3	2	1	999	0	1	2	0	1	2	1	0	1	2	2	1	0	0	1	0	1	1	0	0	0	0	1	1	1	1	1	1	1	1	1	1	1	2	1	2	1	1	1	1
170	0	51	102	184	30.1276	3	2	2	2	1	999	0	0	0	0	2	1	1	0	1	1	1	1	1	1	1	1	0	1	1	0	0	0	1	1	1	2	2	1	2	1	1	2	1	2	1	1	1	1
171	1	39	45	163	16.937	1	2	2	1	0	1	0	1	0	0	0	0	0	1	3	0	0	1	1	0	0	0	0	1	0	1	1	1	1	1	1	1	1	1	2	2	2	1	2	1	1	1	1	2
171	1	58	71	158	28.441	2	2	1	999	0	1	0	0	0	0	2	0	1	2	2	0	0	1	1	1	0	0	0	0	0	1	1	1	1	1	1	1	2	2	2	2	1	1	2	1	1	1	1	2
172	1	54	77	172	26.0276	2	2	2	2	1	999	0	1	1	0	2	1	0	1	3	1	1	0	1	1	1	1	0	1	0	1	0	1	1	1	1	1	2	1	2	1	1	2	1	2	1	1	2	1
173	1	24	50	161	19.2894	0	2	1	999	0	0	2	0	0	0	2	0	1	1	2	1	0	1	1	1	1	1	0	1	1	1	1	1	1	1	1	1	2	1	1	1	1	2	2	1	1	1	1	1
174	1	24	65	165	23.8751	0	2	1	999	0	0	2	1	0	0	2	0	0	1	1	0	0	0	1	0	0	0	0	1	0	1	1	1	1	1	1	1	1	1	1	1	1	2	1	1	1	1	1	1
175	1	33	55	170	19.0311	0	2	1	999	0	1	0	0	0	0	2	1	0	1	2	1	1	1	0	1	1	0	0	0	0	1	1	1	1	1	1	1	1	1	1	1	1	1	1	2	1	1	1	1
176	1	24	47	158	18.8271	0	2	1	999	0	1	0	1	1	2	2	0	1	0	2	0	0	0	0	0	0	1	0	1	0	0	0	1	1	1	1	1	1	1	1	2	1	1	1	1	1	1	1	2
177	1	38	69	172	23.3234	0	2	1	999	0	1	0	1	0	0	1	1	0	0	1	1	1	1	1	1	1	0	1	1	0	1	1	0	1	1	1	2	1	2	2	2	1	2	1	2	1	2	2	2
178	1	40	61	155	25.3902	2	2	2	2	1	999	2	1	0	0	2	1	1	1	1	1	1	1	0	1	1	1	0	1	0	1	0	0	1	1	1	2	1	1	1	2	1	1	1	1	1	1	2	1
179	1	52	74	167	26.5338	2	2	2	2	0	1	3	0	0	0	2	1	0	2	2	1	1	1	1	0	0	0	0	1	0	1	0	1	1	1	1	1	1	1	1	1	1	1	1	2	1	1	2	1
180	0	39	90	178	28.4055	2	2	2	2	0	1	0	1	0	2	0	1	1	1	1	1	0	0	0	1	0	1	0	1	0	1	1	0	0	1	1	1	1	1	1	1	1	1	1	2	1	1	1	1
181	1	39	48	160	18.75	0	2	2	2	0	0	0	0	0	0	2	1	1	1	2	1	0	1	0	0	0	0	0	1	1	1	0	0	0	1	1	1	1	1	1	2	1	2	1	2	1	1	2	2
182	1	38	64	160	25	2	2	2	2	0	1	3	0	0	0	2	0	1	2	3	1	1	1	1	1	1	0	0	0	0	1	1	1	1	1	1	1	2	1	2	1	1	1	1	1	1	1	1	1
183	1	48	69	159	27.2932	2	4	2	2	0	1	0	0	1	1	2	1	1	1	2	0	1	0	0	1	1	1	0	0	0	1	0	0	1	1	1	1	1	1	1	2	1	2	1	2	1	1	1	1
184	1	35	75	165	27.5482	2	3	2	2	0	1	3	1	1	1	2	0	1	1	3	0	0	0	0	0	0	0	0	0	0	0	0	1	0	2	1	2	2	2	2	2	1	2	2	1	1	2	2	2
185	1	42	69	170	23.8754	0	2	2	2	0	1	0	0	0	0	2	1	1	0	2	1	1	0	0	0	1	1	0	0	0	1	0	0	0	1	1	1	2	1	1	1	1	1	1	1	1	1	2	1
186	1	35	59	160	23.0469	0	2	2	2	0	0	0	2	2	0	2	0	0	1	1	1	0	1	1	1	1	1	0	1	0	1	0	0	1	1	1	1	1	1	1	1	1	2	1	1	1	1	1	1
187	1	28	56	157	22.719	0	2	2	1	0	1	0	1	0	0	2	1	0	1	2	0	1	1	1	1	1	0	0	1	1	1	0	1	0	1	1	1	1	1	1	1	1	1	1	2	1	1	1	1
188	1	38	55	163	20.7008	0	2	2	2	0	1	1	1	0	0	2	0	1	1	2	1	0	0	0	1	0	0	0	1	0	1	0	1	0	1	1	1	2	2	2	2	1	1	2	2	1	1	2	2
189	1	45	85	164	31.6032	3	2	2	2	0	1	0	0	0	0	2	1	1	2	3	1	1	1	0	1	0	0	0	1	1	1	0	0	1	1	1	1	1	1	1	2	1	2	1	2	1	1	1	1
190	1	49	60	162	22.8624	0	2	2	2	1	999	0	1	2	2	1	0	1	1	4	0	0	0	1	0	0	0	0	0	0	1	0	0	0	1	1	1	1	1	1	2	1	2	1	2	1	1	2	1
191	0	36	109	178	34.4022	3	1	2	2	0	1	0	0	0	0	2	1	1	1	2	0	0	1	1	1	0	0	0	1	1	1	0	0	0	1	1	1	1	1	1	1	1	2	1	1	1	1	1	1
192	1	48	63	160	24.6094	0	2	2	2	0	1	0	1	0	0	2	0	1	1	2	0	0	1	0	0	0	1	0	1	0	1	1	0	1	1	1	1	1	1	1	1	1	2	1	1	1	1	2	1
193	1	46	98	162	37.3419	3	4	1	999	1	999	0	1	1	2	2	0	1	2	3	1	1	1	1	0	1	1	0	1	0	1	0	1	1	1	1	1	1	1	2	2	1	2	1	1	1	1	1	2
194	1	50	69	163	25.9701	2	1	3	2	0	0	1	2	2	0	2	0	0	0	1	1	0	1	1	1	1	1	0	1	0	1	0	1	1	1	1	2	2	2	2	2	1	2	2	1	1	1	1	2
195	1	44	73	161	28.1625	2	3	2	2	1	999	3	1	1	0	2	0	0	1	1	1	1	1	1	1	0	1	0	1	0	0	1	1	1	1	1	2	2	2	2	2	1	1	1	1	1	1	1	2
196	0	32	64	161	24.6904	0	2	1	999	1	999	0	1	1	1	2	0	0	1	1	0	0	1	1	1	1	1	1	1	1	0	1	1	1	1	1	1	1	1	1	2	1	2	1	1	1	1	1	1
197	1	40	59	164	21.9363	0	2	1	999	0	1	0	0	0	0	1	0	1	0	1	1	1	0	1	0	1	1	0	0	0	1	1	1	1	1	1	1	2	2	2	2	1	2	1	2	1	1	2	2
198	1	46	78	152	33.7604	3	2	2	2	0	0	3	1	1	1	2	0	1	1	3	1	1	1	1	1	1	1	0	1	0	1	1	0	1	1	1	1	2	1	2	2	1	1	2	1	1	1	1	2
199	1	20	54	169	18.9069	0	1	1	999	1	999	3	0	0	0	2	0	1	1	0	1	0	0	1	1	1	1	0	1	0	1	0	0	1	1	1	1	1	2	2	2	1	1	1	1	1	2	2	2
200	0	58	97	175	31.6735	3	2	2	2	1	999	0	1	0	1	2	0	1	0	0	1	1	1	1	0	1	1	0	1	0	1	1	0	1	1	1	1	1	1	1	2	1	1	1	1	1	1	2	1
201	1	37	57	161	21.9899	0	1	2	2	0	0	0	0	0	0	2	0	0	1	1	1	0	1	1	1	1	0	0	1	0	0	1	1	1	1	1	1	2	2	2	2	1	1	1	1	1	1	1	1
202	1	50	73	170	25.2595	2	2	2	2	1	999	3	1	0	0	2	0	1	1	3	1	0	1	1	1	1	1	0	1	0	1	0	1	1	1	1	2	2	1	1	1	1	2	1	1	1	1	2	2
203	1	44	79	169	27.6601	2	2	4	2	0	1	0	1	0	0	2	0	0	2	3	0	1	0	1	1	0	1	0	1	0	0	0	0	1	1	1	2	1	1	2	1	1	2	1	2	1	1	2	2
204	0	34	104	188	29.4251	2	2	1	999	0	1	0	2	2	1	2	0	0	2	3	1	1	1	1	1	0	1	0	0	0	1	0	1	1	1	1	1	1	1	1	1	1	1	2	1	1	1	1	1
205	1	27	87	165	31.9559	3	5	1	999	0	1	0	0	2	2	2	0	1	1	0	1	1	1	1	1	0	0	0	1	0	1	1	1	1	1	1	1	1	1	2	2	1	2	1	2	1	1	2	1
206	1	40	70	167	25.0995	2	2	2	2	0	1	3	1	0	0	2	0	0	2	2	1	1	1	1	1	0	0	0	1	0	1	1	0	1	1	1	1	1	1	2	1	1	2	2	1	1	1	2	1
207	1	54	63	160	24.6094	0	1	2	2	0	0	1	2	2	2	2	0	0	0	1	0	1	1	1	1	1	0	0	1	0	1	1	1	1	1	1	1	1	1	2	2	1	1	1	1	1	1	1	1
208	1	35	49	162	18.6709	0	1	2	2	0	1	2	1	1	0	2	0	0	1	1	1	1	1	1	0	0	1	0	1	0	0	0	0	1	1	1	1	2	1	2	2	1	1	1	1	1	2	2	1
209	0	62	91	179	28.4011	2	2	2	2	0	1	0	1	1	0	2	1	1	1	2	1	1	1	0	0	0	1	0	1	0	1	1	1	1	1	1	1	1	1	2	1	2	1	2	1	1	1	1	2
210	0	30	93	182	28.0763	2	1	1	999	0	1	2	0	1	1	1	0	0	1	1	0	0	0	0	0	0	1	0	0	0	0	0	0	0	1	1	1	1	1	1	1	1	1	1	2	1	1	2	1
211	0	35	78	176	25.1808	2	2	1	999	0	0	0	0	0	1	1	1	0	1	1	1	0	0	0	1	0	1	0	1	0	1	1	1	1	1	1	1	1	1	1	1	1	1	2	1	1	1	2	2
212	1	36	75	171	25.6489	2	5	1	999	0	1	0	0	0	1	2	1	0	1	2	0	0	1	1	1	0	1	1	1	1	1	1	1	1	1	1	1	1	1	1	1	1	2	2	1	1	1	1	1
213	0	39	100	183	29.8606	2	1	1	999	0	1	0	0	0	0	0	0	0	1	2	0	0	1	1	1	1	1	0	1	1	0	1	1	0	1	1	1	2	1	1	1	1	1	1	1	1	1	2	2
214	1	30	58	165	21.3039	0	2	1	999	0	0	0	1	0	0	2	0	1	1	0	1	1	1	1	1	1	1	1	1	1	1	1	1	1	1	1	1	1	1	2	2	1	1	1	1	1	1	1	2
215	1	25	58	175	18.9388	0	2	1	999	0	1	3	0	0	0	2	0	1	0	1	1	1	0	1	1	1	1	0	0	0	1	0	1	1	1	1	1	1	2	2	2	1	2	2	1	1	1	2	1
216	1	36	58	160	22.6562	0	2	2	2	0	1	0	0	0	0	2	0	1	1	1	1	1	1	0	1	0	0	0	1	1	0	0	1	1	1	1	1	1	1	2	2	1	2	1	2	1	1	1	1
217	1	39	52	161	20.061	0	2	1	999	0	1	0	1	0	0	2	0	1	0	1	0	1	1	1	1	1	1	0	1	0	1	0	1	1	1	1	2	2	2	2	2	1	1	2	1	1	1	2	1
218	1	20	48	163	18.0662	1	3	1	999	1	999	3	1	0	0	2	1	0	1	3	1	1	1	1	1	0	0	0	1	0	1	1	0	1	1	1	1	1	2	1	2	1	2	1	1	1	1	2	1
219	0	25	90	173	30.0712	3	2	1	999	0	1	0	1	0	0	1	0	0	0	0	1	0	1	1	0	1	0	0	0	1	1	0	0	0	1	1	1	1	1	2	1	1	1	1	1	1	1	1	1
220	1	27	56	160	21.875	0	2	2	2	0	1	0	0	0	0	2	0	1	0	2	1	0	1	0	0	1	1	0	0	0	0	0	1	1	1	1	1	1	1	1	1	1	2	1	1	1	1	2	1
221	1	22	60	180	18.5185	0	2	1	999	0	0	2	0	1	0	2	0	1	1	2	0	1	1	1	1	1	1	0	1	0	1	0	1	1	1	1	1	2	1	2	2	1	1	1	1	1	1	2	1
222	1	22	75	176	24.2123	0	5	1	999	0	0	3	0	0	1	2	0	1	0	1	0	0	1	1	0	1	0	0	1	0	1	1	0	1	1	1	1	1	1	1	2	1	2	1	2	1	1	1	1
223	0	30	100	190	27.7008	2	2	1	999	0	1	0	0	0	0	2	0	0	1	1	1	0	1	1	1	1	0	0	1	0	1	1	1	1	1	1	1	1	2	2	2	1	1	1	1	1	1	2	1
224	1	20	80	160	31.25	3	3	1	999	0	0	3	1	1	1	2	1	1	2	3	0	1	0	0	1	1	1	1	0	1	1	0	1	0	1	1	1	1	1	2	1	1	1	1	1	1	1	1	1
225	1	31	65	173	21.7181	0	5	1	999	0	0	0	1	2	1	2	0	1	2	2	0	0	0	0	1	1	1	0	0	0	0	0	1	1	1	1	1	1	2	1	2	1	2	1	2	1	1	1	1
226	1	35	63	163	23.7118	0	2	2	2	1	999	1	0	1	1	2	0	1	1	1	0	1	1	0	1	1	0	0	1	0	1	0	1	1	1	1	1	1	1	1	2	1	2	2	1	1	1	2	1
227	0	34	80	175	26.1224	2	2	1	999	0	1	0	1	0	0	1	0	0	1	2	1	1	1	0	1	1	1	0	1	0	1	0	1	1	1	1	1	1	1	1	1	1	1	1	1	1	1	1	1
228	0	26	120	180	37.037	3	2	1	999	0	1	0	1	0	0	1	1	1	1	1	1	1	1	1	0	1	0	0	1	0	0	1	0	1	1	1	1	2	1	2	1	1	2	1	2	1	1	2	1
229	0	21	58	177	18.5132	0	2	1	999	0	1	3	1	0	0	2	0	1	0	1	1	0	1	0	0	1	1	0	0	0	0	0	0	1	1	1	1	1	1	1	1	1	2	1	1	1	1	2	1
230	1	34	90	160	35.1562	3	2	2	2	0	1	0	1	0	0	2	0	1	1	2	0	1	1	0	1	0	0	0	1	0	0	0	0	1	1	1	1	1	1	1	1	1	2	1	1	1	1	2	2
231	1	49	68	167	24.3824	0	2	2	2	0	1	3	1	1	1	2	1	0	1	2	1	1	1	1	1	0	1	0	1	0	1	1	0	1	1	1	1	1	1	1	2	1	1	1	1	1	1	1	1
232	0	25	75	185	21.9138	0	2	1	999	0	1	0	1	0	0	2	1	0	1	0	1	1	0	0	0	0	0	0	1	0	1	1	1	1	1	1	1	1	1	2	1	1	1	1	1	1	1	1	1
233	1	30	63	156	25.8876	2	2	2	1	0	1	3	1	0	0	2	0	1	2	3	0	1	1	1	0	0	0	0	0	0	1	1	0	0	1	1	1	2	1	1	2	1	1	1	2	1	1	2	1
234	1	26	70	171	23.939	0	2	2	2	0	1	1	2	0	1	2	1	1	2	1	0	1	1	1	1	0	1	0	1	0	1	0	0	1	1	1	1	1	1	1	1	1	1	1	2	1	1	1	1
235	1	22	70	165	25.7117	2	2	1	999	0	1	0	0	1	1	1	0	1	1	2	0	0	1	0	1	1	1	0	1	0	0	0	0	1	1	1	1	1	1	2	1	1	1	1	2	1	1	1	1
236	1	48	65	158	26.0375	2	2	1	999	0	1	1	0	0	0	2	0	0	1	1	0	0	1	0	1	1	1	0	1	0	1	0	1	1	1	1	1	1	1	2	2	1	2	1	1	1	1	1	1
237	1	22	60	164	22.3081	0	2	1	999	0	1	3	0	0	0	2	0	1	0	1	0	1	1	0	0	0	0	0	1	0	1	1	1	0	1	1	1	1	1	1	1	1	2	1	1	1	1	1	1
238	1	28	65	160	25.3906	2	2	1	999	0	1	0	1	0	0	2	1	0	0	0	1	0	1	1	1	0	1	0	1	1	1	0	0	0	1	1	1	1	1	1	1	1	1	1	1	1	1	1	1
239	0	38	77	176	24.858	0	2	1	999	0	1	1	1	0	0	2	0	0	1	0	1	0	0	0	0	0	1	1	1	0	0	1	1	1	1	1	1	1	1	1	1	1	1	1	1	1	1	1	1
240	1	20	58	167	20.7967	0	2	1	999	0	1	3	1	0	0	2	0	0	1	1	0	0	1	1	0	1	1	0	0	0	0	1	0	0	1	1	1	1	1	1	2	1	2	1	1	1	1	1	1
241	0	20	80	183	23.8884	0	2	1	999	0	1	1	1	0	0	2	0	1	2	2	0	0	1	1	0	1	1	0	0	0	1	0	0	0	1	1	1	1	1	1	1	1	2	1	2	1	1	1	1
242	1	29	69	172	23.3234	0	2	1	999	0	1	0	1	1	0	2	1	0	1	1	1	0	0	1	1	0	0	0	1	0	0	1	0	1	1	1	2	2	1	2	2	1	2	2	1	1	1	2	2
243	1	47	83	173	27.7323	2	2	1	999	1	999	0	2	2	2	1	0	1	1	1	1	0	0	0	0	0	1	0	1	1	1	0	0	1	1	1	1	2	1	2	1	1	2	1	1	1	2	1	2
244	1	40	68	169	23.8087	0	2	2	2	0	1	1	0	1	1	2	1	1	1	1	0	0	1	1	0	0	0	0	1	0	1	1	1	1	1	1	1	1	1	1	1	1	1	2	1	1	1	1	1
245	0	47	83	173	27.7323	2	2	1	999	1	999	0	2	2	2	1	0	1	1	1	1	0	0	0	0	0	1	0	1	1	1	0	0	1	1	1	1	2	1	2	1	1	2	1	1	1	2	1	2
246	1	22	48	158	19.2277	0	1	1	999	0	0	1	1	2	2	2	1	0	0	2	1	0	0	0	0	0	0	0	0	0	1	1	0	0	1	1	1	1	2	2	2	1	2	2	1	2	2	2	2
247	1	49	60	160	23.4375	0	2	2	2	0	1	0	1	0	0	2	0	1	1	2	0	0	1	1	0	0	1	0	1	1	1	1	1	1	1	1	1	1	1	1	1	1	1	2	1	1	1	1	2
248	1	25	70	158	28.0404	2	2	1	999	0	0	0	0	2	2	1	0	1	1	1	1	1	0	0	0	1	0	0	1	0	1	1	1	1	1	1	2	1	2	1	1	1	2	1	1	1	1	1	1
249	1	43	60	170	20.7612	0	2	2	2	0	1	0	0	0	0	2	0	1	1	1	0	1	1	1	1	0	0	0	1	1	1	1	1	1	1	1	1	1	2	2	2	1	1	2	1	1	1	1	1
250	0	22	85	175	27.7551	2	2	1	999	0	0	2	1	1	0	1	0	0	1	0	1	1	0	1	1	0	0	1	1	1	1	0	1	1	1	1	1	1	2	1	1	1	1	1	1	2	1	1	2
251	0	65	72	170	24.9135	0	2	2	2	0	1	0	1	0	0	2	0	0	1	2	1	1	1	1	1	0	0	0	1	0	1	1	0	1	1	1	1	2	1	2	1	1	1	2	1	1	1	1	1
252	1	27	52	170	17.9931	1	2	1	999	0	1	0	1	2	2	1	1	1	1	1	0	1	0	0	0	0	1	0	1	0	1	1	1	1	1	2	1	2	2	2	1	1	2	1	2	1	1	2	1
253	0	22	85	175	27.7551	2	2	1	999	0	0	2	1	1	0	1	0	0	1	0	1	1	0	1	1	0	0	1	1	0	1	0	1	1	1	1	1	1	2	1	1	1	1	1	1	2	1	1	2
254	0	22	93	181	28.3874	2	2	1	999	0	1	3	2	0	2	1	1	1	2	2	0	0	1	0	0	1	0	0	1	0	0	1	0	1	1	1	1	1	1	2	1	1	1	1	2	1	1	2	1
255	1	39	65	167	23.3067	0	2	2	2	0	1	3	0	0	0	2	0	1	1	2	0	1	1	1	0	0	0	0	1	0	1	1	1	1	1	1	1	2	1	2	2	1	2	1	1	1	1	1	1
256	1	49	65	170	22.4913	0	2	2	2	0	1	0	0	0	0	1	0	1	0	0	0	1	1	1	1	1	1	0	1	1	1	1	1	1	1	1	1	1	1	1	1	1	2	1	2	1	1	1	1
257	1	30	56	160	21.875	0	2	2	1	0	0	0	2	2	2	2	1	0	1	1	1	0	0	0	0	0	1	1	0	0	1	1	1	1	1	1	1	1	2	2	2	1	2	1	2	1	1	2	1
258	1	31	73	173	24.3911	0	2	1	999	0	1	0	0	2	2	2	1	0	2	2	0	1	0	1	1	1	0	0	1	0	1	0	0	0	1	1	1	1	1	1	1	1	2	1	1	1	1	1	1
259	1	45	63	170	21.7993	0	2	2	2	1	999	3	2	2	2	1	1	1	2	3	1	1	1	0	0	0	1	0	0	1	1	0	0	1	1	1	1	1	1	2	2	1	2	2	1	2	1	1	1
260	1	40	70	165	25.7117	2	1	2	2	1	999	3	0	1	1	2	0	1	1	2	0	0	1	0	0	1	0	0	1	0	0	0	0	1	1	1	1	1	1	2	2	1	2	1	2	2	2	1	1
261	1	56	78	160	30.4688	3	5	2	2	0	1	3	2	2	2	2	0	1	1	3	1	1	1	0	1	0	0	0	1	0	0	1	1	1	1	1	1	2	1	2	2	1	1	2	1	1	1	1	1
262	1	42	58	160	22.6562	0	1	2	2	1	999	2	2	2	2	2	1	1	1	2	0	0	0	0	0	1	0	0	1	0	0	0	1	1	1	1	2	2	2	2	2	1	2	1	2	1	1	2	1
263	1	43	57	165	20.9366	0	2	3	2	0	0	0	2	2	0	2	0	0	1	2	1	1	1	1	1	1	1	0	1	0	0	1	0	1	1	1	1	1	2	2	2	1	2	1	2	1	1	2	2
264	1	43	60	168	21.2585	0	2	2	2	0	1	0	0	0	0	2	0	1	1	1	0	1	1	1	1	0	0	0	1	1	1	1	1	1	1	1	1	1	2	2	2	1	1	2	1	1	1	1	1
265	1	39	90	165	33.0579	3	2	2	2	0	1	2	1	0	2	2	0	1	2	3	1	1	1	0	0	0	0	0	1	0	1	0	1	1	1	1	1	1	1	1	2	1	2	1	2	1	1	1	1
266	1	35	49	162	18.6709	0	2	2	2	0	1	3	1	1	0	2	0	0	1	1	1	1	1	1	0	0	1	0	1	0	0	0	0	1	1	1	1	2	1	2	2	1	1	1	1	1	2	2	1
267	1	43	50	155	20.8117	0	2	2	2	0	1	0	1	0	0	2	0	1	1	2	0	1	1	1	1	0	0	0	0	0	1	0	0	1	1	1	1	2	2	2	2	1	2	2	1	1	1	2	2
268	1	51	73	160	28.5156	2	2	1	999	0	1	0	0	0	0	2	1	1	0	1	1	0	0	1	1	1	0	0	1	0	1	0	0	1	1	1	1	2	1	2	2	1	2	2	1	1	1	2	2
269	1	32	66	156	27.1203	2	2	2	1	0	1	0	0	1	0	2	1	1	0	1	0	0	1	1	1	0	1	0	0	0	1	1	0	1	1	1	1	1	1	1	1	1	1	1	1	1	1	1	1
270	1	50	75	165	27.5482	2	2	1	999	1	999	2	1	0	2	2	1	1	2	3	0	0	1	1	0	0	0	0	1	0	1	0	0	1	1	1	1	2	1	2	2	1	2	1	2	1	1	1	1
272	1	42	69	161	26.6193	2	2	2	2	0	1	0	0	0	1	2	0	1	1	2	0	1	0	0	0	1	0	0	1	0	1	0	1	0	1	1	1	2	1	1	1	1	2	1	1	1	1	2	1
273	1	42	53	155	22.0604	0	2	2	2	0	1	0	0	1	1	2	0	0	2	3	1	0	1	0	0	0	1	0	1	0	0	1	1	0	1	1	1	2	1	2	1	1	2	1	1	1	1	2	1
274	1	51	100	155	41.6233	3	2	2	2	1	999	3	1	1	1	2	1	1	1	2	1	1	1	1	1	0	1	0	1	1	1	0	0	1	1	1	1	1	1	2	1	1	2	1	1	1	1	1	1
275	0	34	87	188	24.6152	0	2	2	1	0	0	0	1	2	0	2	0	0	1	3	1	1	1	1	0	0	0	0	1	1	0	1	1	1	1	1	1	2	1	2	1	1	1	2	1	1	1	1	2
276	1	39	79	168	27.9904	2	2	2	2	0	1	3	1	0	0	2	1	1	2	2	0	0	1	1	1	0	0	0	0	0	1	0	1	0	1	1	1	1	1	1	1	1	1	2	1	1	1	2	1
277	1	33	58	164	21.5645	0	2	2	1	0	1	0	0	0	0	2	0	0	1	1	0	1	1	1	0	0	1	0	1	0	1	0	0	0	1	1	1	1	1	2	1	1	2	1	1	1	1	1	1
278	1	21	42	162	16.0037	1	1	1	999	0	0	1	0	0	1	2	0	1	1	2	1	1	1	1	0	1	0	0	0	0	1	1	0	1	1	1	1	1	2	2	2	1	1	1	1	1	1	1	1
279	1	57	68	173	22.7204	0	2	2	2	0	0	0	1	1	0	2	0	1	1	2	1	1	1	0	1	1	0	0	0	0	1	1	1	1	1	1	1	1	1	2	1	1	1	2	1	1	1	2	1
280	1	30	50	160	19.5312	0	2	2	2	0	1	0	1	1	2	2	0	1	1	2	1	1	0	0	0	1	1	0	1	1	1	0	1	1	1	1	1	1	1	1	2	1	2	1	2	1	2	1	2
281	1	26	70	168	24.8016	0	2	1	999	0	1	0	1	0	0	2	0	1	1	3	1	1	1	1	0	0	0	1	1	0	0	0	0	0	1	1	1	1	1	1	1	1	1	1	1	1	1	1	1
282	1	22	55	160	21.4844	0	2	1	999	1	999	3	1	1	2	2	0	1	0	2	0	0	0	1	0	0	0	0	1	0	0	1	0	0	1	1	2	1	1	2	1	1	2	1	1	1	1	1	1
283	1	41	55	160	21.4844	0	2	2	2	0	0	1	1	0	0	2	0	1	1	1	0	0	1	1	1	0	0	0	0	0	1	0	1	1	1	1	1	1	2	2	2	1	2	1	1	1	1	1	2
284	1	34	68	169	23.8087	0	2	2	2	0	1	0	0	0	0	2	0	1	1	1	1	0	0	0	1	1	1	0	1	0	1	0	1	1	1	1	1	1	1	2	1	1	2	1	1	1	1	2	1
285	1	35	67	161	25.8478	2	2	2	2	0	0	0	3	2	2	2	0	0	0	1	1	0	1	1	1	1	0	0	0	0	1	0	1	0	1	1	2	2	2	2	1	2	2	2	2	2	1	1	2
286	1	32	68	168	24.093	0	2	2	2	0	0	0	1	0	0	1	0	1	0	1	1	0	0	1	0	0	1	0	1	0	0	0	1	1	1	1	1	1	1	1	1	1	2	1	1	1	1	1	1
287	1	37	70	162	26.6728	2	2	2	2	0	1	3	2	2	2	2	1	1	2	2	0	0	1	1	1	0	1	0	0	0	1	0	0	1	1	1	1	1	1	1	1	1	2	1	1	1	1	2	1
288	1	39	94	160	36.7188	3	2	2	2	0	1	0	0	0	0	2	0	1	2	2	1	1	1	1	1	0	0	0	1	0	1	1	0	1	1	1	1	1	1	1	1	1	1	2	1	1	1	1	1
289	1	46	73	168	25.8645	2	2	2	2	1	999	3	0	0	0	2	1	1	0	1	1	0	1	1	0	1	1	0	0	1	1	0	1	1	1	1	2	2	1	2	1	1	1	1	1	2	1	2	1
290	1	38	60	166	21.7738	0	2	2	2	0	0	0	0	0	0	2	0	1	2	2	1	1	1	0	1	1	1	0	1	0	0	1	1	1	1	2	1	1	1	2	1	1	2	1	1	1	1	2	1
291	1	29	55	156	22.6003	0	2	1	999	0	1	0	2	2	2	2	1	1	2	3	0	0	1	0	1	0	0	1	0	0	1	1	1	1	1	1	1	1	1	1	1	1	1	1	2	1	1	2	1
292	1	40	80	168	28.3447	2	1	2	2	1	999	0	1	2	2	2	1	1	1	2	1	0	0	0	1	1	1	0	1	0	1	1	1	0	2	1	2	1	1	1	2	1	2	1	1	1	1	2	1
293	0	30	92	187	26.309	2	1	1	999	0	1	1	2	2	2	2	0	0	0	0	1	0	1	0	1	1	1	0	1	0	1	0	1	1	1	1	2	1	1	2	2	1	2	1	1	1	1	2	1
294	0	21	72	179	22.4712	0	5	1	999	1	999	3	0	1	0	2	0	0	1	1	1	1	1	0	0	1	1	0	0	1	1	1	1	0	1	1	1	2	1	1	1	1	1	1	1	1	1	2	2
295	1	40	87	160	33.9844	3	2	3	2	0	1	2	1	1	2	2	1	1	3	3	1	1	0	0	1	0	0	0	1	0	1	0	1	1	1	1	1	1	1	2	2	1	2	1	2	1	1	2	1
296	0	66	72	178	22.7244	0	2	2	1	1	999	0	2	0	2	2	1	1	1	1	0	1	1	1	0	0	0	0	1	0	1	0	1	1	1	1	1	2	1	2	2	1	1	2	1	1	1	1	2
297	1	55	56	161	21.6041	0	2	2	2	0	1	3	1	1	2	2	1	1	1	1	1	1	0	0	0	0	0	1	0	1	0	0	1	1	1	1	1	1	1	1	1	1	1	1	1	1	1	1	1
298	1	30	58	180	17.9012	1	2	2	2	0	1	0	1	0	0	2	1	0	1	0	1	1	1	1	1	1	1	0	1	0	1	0	0	1	1	1	2	1	1	1	1	1	1	1	2	1	1	1	1
299	1	45	52	160	20.3125	0	2	2	2	0	1	0	1	2	0	2	0	1	2	2	1	0	1	1	1	1	1	0	0	0	0	0	1	1	1	1	1	1	2	2	1	1	2	2	1	1	1	2	2
300	1	40	54	170	18.6851	0	2	2	2	0	1	0	0	2	2	2	0	0	1	3	1	1	1	1	0	0	1	0	1	1	1	0	0	1	2	1	2	1	2	2	2	1	1	1	1	1	2	2	2
301	1	40	89	180	27.4691	2	2	2	2	2	999	2	2	1	2	2	1	1	2	3	1	0	0	0	1	0	1	1	0	0	0	1	1	0	2	1	2	1	2	1	2	1	2	2	1	1	2	2	2
302	1	59	68	150	30.2222	3	1	2	2	0	1	1	0	1	1	2	0	1	2	3	1	1	1	1	1	1	1	0	1	1	1	1	1	1	1	1	1	1	1	1	1	1	1	1	2	1	1	1	1
303	1	50	63	160	24.6094	0	1	2	2	1	999	0	1	1	1	2	1	0	1	0	0	1	1	0	1	1	1	0	0	0	1	0	1	1	1	1	2	1	1	2	2	1	2	2	1	1	1	2	2
304	1	26	62	180	19.1358	0	2	1	999	0	1	0	1	1	0	2	0	1	1	0	0	0	1	0	0	1	1	0	0	0	1	0	1	1	1	1	2	1	1	1	1	1	2	1	1	2	1	2	1
305	1	34	59	156	24.2439	0	2	2	2	0	1	2	1	2	2	2	1	1	1	2	0	1	1	1	1	0	0	0	1	0	0	0	0	1	1	1	1	1	1	1	2	1	2	1	1	1	1	2	1
306	1	47	69	150	30.6667	3	2	1	999	0	1	0	1	1	1	2	1	1	1	2	1	1	1	1	1	1	0	0	1	0	0	0	0	1	1	1	1	1	1	2	1	1	2	1	1	1	1	1	2
307	1	29	53	165	19.4674	0	1	1	999	0	1	0	1	0	0	1	0	0	1	0	0	0	0	0	0	1	1	0	0	0	1	1	1	1	1	1	1	1	1	2	1	1	2	1	2	2	1	2	2
308	0	58	66	176	21.3068	0	2	2	2	0	1	0	0	0	0	2	0	1	0	0	1	1	1	1	1	0	0	0	1	0	0	1	0	1	1	1	1	1	1	1	2	1	2	1	2	1	1	1	2
309	0	29	85	180	26.2346	2	2	1	999	0	1	0	0	0	1	2	0	1	0	2	1	0	0	0	1	0	0	1	0	0	1	1	1	1	1	1	2	1	1	2	2	2	1	2	1	2	1	2	2
310	1	27	50	163	18.8189	0	1	1	999	0	1	0	2	2	2	2	0	1	0	0	1	1	0	0	1	0	0	0	1	0	0	1	0	1	1	1	1	1	2	2	2	1	1	1	2	1	1	2	2
311	1	31	60	163	22.5827	0	2	2	2	0	1	0	1	1	2	2	0	0	1	2	0	0	0	1	0	0	1	0	1	0	1	1	1	1	1	1	1	1	1	1	1	1	2	1	2	1	1	1	1
312	1	35	59.9	164	22.271	0	2	1	999	0	1	0	1	0	0	2	1	1	1	4	1	0	1	0	1	0	0	0	1	0	0	1	0	1	1	1	2	2	1	2	2	1	2	1	1	1	1	2	1
313	1	43	62	158	24.8358	0	2	2	2	0	1	1	0	1	0	2	0	1	1	2	0	0	0	1	0	0	0	0	1	0	1	0	0	0	1	1	1	2	2	2	2	1	1	1	2	1	1	2	2
314	1	64	85	160	33.2031	3	2	2	2	1	999	1	1	0	1	2	1	1	1	1	1	1	1	0	1	0	1	0	0	0	1	0	1	1	1	1	1	1	1	1	2	1	2	1	2	1	1	1	1
315	0	31	82	185	23.9591	0	1	2	1	0	1	0	2	1	1	2	1	1	1	1	1	0	1	0	0	1	1	0	1	0	1	0	0	1	1	1	1	2	1	2	2	1	2	1	1	1	1	2	1
316	1	25	63	163	23.7118	0	2	1	999	0	1	0	0	0	0	2	0	0	1	2	1	1	1	0	1	1	1	0	1	0	1	1	0	0	1	1	1	2	1	1	2	1	2	2	1	1	1	1	2
317	0	26	95	175	31.0204	3	2	1	999	0	1	0	1	1	0	0	0	1	1	3	1	1	1	0	0	1	0	0	1	0	0	1	1	1	1	1	1	1	1	1	1	1	1	1	1	1	1	1	1
318	1	54	70	168	24.8016	0	2	4	2	1	999	1	1	1	2	1	1	0	3	2	1	0	1	0	0	0	0	0	1	0	0	0	0	1	1	1	2	2	1	2	2	1	2	2	1	1	1	2	2
319	1	31	78	170	26.9896	2	2	2	1	0	0	0	1	0	0	2	0	1	1	2	0	1	1	1	1	1	1	1	1	1	1	1	1	1	1	1	1	1	1	1	1	2	1	2	1	1	1	1	1
320	1	52	70	168	24.8016	0	2	2	2	0	1	3	1	0	2	2	0	0	2	2	0	1	1	1	1	0	0	1	1	1	1	1	0	1	1	1	2	2	1	2	2	1	2	2	1	1	1	1	1
321	1	60	90	161	34.7209	3	2	2	2	1	999	3	0	0	0	2	1	1	1	1	1	1	1	1	1	0	1	0	1	1	1	0	1	1	1	1	1	2	1	1	2	1	2	1	2	1	1	1	1
322	0	66	75	183	22.3954	0	1	2	2	1	999	0	1	0	0	2	1	1	2	1	1	1	1	0	0	0	1	0	1	0	1	1	0	1	1	1	2	2	1	2	1	2	1	2	1	1	1	2	2
323	1	60	65	167	23.3067	0	2	4	2	0	1	0	1	1	2	2	1	1	2	2	1	1	1	1	1	1	0	0	1	0	1	1	1	0	1	1	1	2	1	2	2	1	1	1	1	1	1	1	2
324	1	47	69	150	30.6667	3	2	1	999	0	1	0	1	1	1	2	1	1	1	2	1	1	1	1	1	1	0	0	1	0	0	0	0	1	1	1	1	1	1	2	1	1	2	1	1	1	1	1	2
325	0	37	102.5	175	33.4694	3	2	1	999	0	1	0	1	0	0	2	0	1	0	1	1	0	0	0	1	0	1	0	1	0	1	1	0	1	1	1	1	1	1	2	1	1	2	1	1	1	1	1	1
326	1	40	57	157	23.1247	0	2	2	2	1	999	1	1	0	0	2	0	1	1	2	0	0	1	0	0	0	1	0	0	0	0	0	1	1	1	1	1	1	1	1	2	1	2	1	1	1	1	2	1
[truncated: 80 more columns]
